# Supplementary material for: Eco-friendly inorganic molecular novel antiperovskites for light-emitting application
Source: Royal Society of Chemistry journal article supplement (doi:10.1039/d2mh01216b), 2023-01-01
Supplement: d2mh01216b1.xlsx [file d2mh01216b1.xlsx]

## Sheet: valence
formula [MN]BX3	bandgap	direct(1)/ indirect(0)
kind1
(LiCl4)N0.5As0.5Ba3	0.9769	1
(LiCl4)N0.5P0.5Ba3	1.0267	1
(LiF4)NSr3	1.0605	1
(LiF4)NCa3	1.5885	1
kind2
(CoBr4)Br0.5Cl0.5Cs3	0
(CoBr4)Br0.5Cl0.5K3	0
(CoBr4)Br0.5Cl0.5Rb3	0
(CoBr4)BrCs3	0
(CoBr4)BrRb3	0
(CoBr4)Cl0.5I0.5Rb3	0
(CoBr4)ClCs3	0
(CoBr4)ClK3	0
(CoBr4)ClRb3	0
(CoBr4)F0.5I0.5K3	0
(CoBr4)F0.5I0.5Rb3	0
(CoCl4)Br0.5Cl0.5K3	0
(CoCl4)Br0.5F0.5K3	0
(CoCl4)ClCs3	0
(CoCl4)ClK3	0
(CoCl4)ClRb3	0
(CoCl4)F0.5I0.5K3	0
(CoCl4)F0.5I0.5Rb3	0
(CoF4)FNa3	0
(CoI4)Br0.5Cl0.5Cs3	0
(CoI4)Br0.5Cl0.5K3	0
(CoI4)Br0.5Cl0.5Rb3	0
(CoI4)Br0.5I0.5Cs3	0
(CoI4)BrCs3	0
(CoI4)BrRb3	0
(CoI4)Cl0.5I0.5Cs3	0
(CoI4)Cl0.5I0.5Rb3	0
(CoI4)ICs3	0
(CuBr4)Br0.5Cl0.5Cs3	0
(CuBr4)Br0.5Cl0.5K3	0
(CuBr4)Br0.5Cl0.5Rb3	0
(CuBr4)BrCs3	0
(CuBr4)BrRb3	0
(CuBr4)ClCs3	0
(CuBr4)ClK3	0
(CuBr4)ClRb3	0
(CuBr4)F0.5I0.5K3	0
(CuBr4)F0.5I0.5Rb3	0
(CuCl4)Br0.5F0.5K3	0
(CuCl4)ClCs3	0
(CuCl4)ClK3	0
(CuCl4)ClRb3	0
(CuCl4)F0.5I0.5K3	0
(CuCl4)F0.5I0.5Rb3	0
(CuF4)FNa3	0
(FeBr4)Br0.5Cl0.5Cs3	0
(FeBr4)Br0.5Cl0.5K3	0
(FeBr4)Br0.5Cl0.5Rb3	0
(FeBr4)BrCs3	0
(FeBr4)BrRb3	0
(FeBr4)Cl0.5I0.5Cs3	0
(FeBr4)Cl0.5I0.5Rb3	0
(FeBr4)ClCs3	0
(FeBr4)ClK3	0
(FeBr4)ClRb3	0
(FeBr4)F0.5I0.5K3	0
(FeBr4)F0.5I0.5Rb3	0
(FeCl4)Br0.5Cl0.5Cs3	0
(FeCl4)Br0.5Cl0.5K3	0
(FeCl4)Br0.5Cl0.5Rb3	0
(FeCl4)Br0.5F0.5K3	0
(FeCl4)ClCs3	0
(FeCl4)ClK3	0
(FeCl4)ClRb3	0
(PdI4)Cl0.5I0.5Rb3	0.2916	0
(PdI4)ICs3	0.3743	0
(PdI4)Br0.5I0.5Cs3	0.3856	0
(PdI4)Cl0.5I0.5Cs3	0.4059	0
(PdBr4)F0.5I0.5K3	0.4252	0
(FeI4)BrCs3	0.4925	1
(PdI4)BrCs3	0.5226	0
(PdBr4)F0.5I0.5Rb3	0.5231	0
(FeI4)BrRb3	0.5247	1
(FeI4)Cl0.5I0.5Rb3	0.5385	1
(PdBr4)Cl0.5I0.5Rb3	0.5418	0
(FeI4)Br0.5Cl0.5Rb3	0.5523	1
(PdI4)BrRb3	0.5543	0
(FeI4)Br0.5I0.5Cs3	0.5586	1
(PdI4)Br0.5Cl0.5Cs3	0.5754	0
(FeI4)Cl0.5I0.5Cs3	0.5767	1
(FeI4)ICs3	0.5776	1
(FeI4)Br0.5Cl0.5Cs3	0.5829	1
(PdBr4)Cl0.5I0.5Cs3	0.5855	0
(PtI4)Cl0.5I0.5Rb3	0.5912	1
(FeCl4)F0.5I0.5K3	0.5955	1
(PdCl4)F0.5I0.5K3	0.5991	0
(PtI4)ICs3	0.6117	0
(FeCl4)F0.5I0.5Rb3	0.6146	1
(PtI4)Br0.5I0.5Cs3	0.6234	0
(PtI4)Br0.5Cl0.5K3	0.6268	0
(PdBr4)BrCs3	0.6319	0
(PdCl4)F0.5I0.5Rb3	0.654	0
(PdBr4)BrRb3	0.6608	0
(PtI4)Cl0.5I0.5Cs3	0.6678	0
(PdBr4)Br0.5Cl0.5Cs3	0.6739	0
(PdBr4)Br0.5Cl0.5K3	0.6793	0
(PdBr4)Br0.5Cl0.5Rb3	0.6937	0
(PdBr4)ClCs3	0.7194	0
(PtI4)BrCs3	0.7437	0
(NiBr4)ClCs3	0.7498	0
(PtI4)Br0.5Cl0.5Rb3	0.7553	0
(PtI4)BrRb3	0.7565	0
(PdBr4)ClRb3	0.7819	0
(PdBr4)ClK3	0.7906	0
(PtI4)Br0.5Cl0.5Cs3	0.8019	0
(NiCl4)ClCs3	0.8057	0
(NiBr4)Br0.5Cl0.5Cs3	0.822	0
(PdCl4)Br0.5Cl0.5Rb3	0.8286	0
(PdCl4)Br0.5Cl0.5Cs3	0.8298	0
(PdCl4)Br0.5Cl0.5K3	0.8347	0
(NiBr4)BrCs3	0.8356	0
(PtBr4)F0.5I0.5K3	0.8539	1
(PdCl4)ClRb3	0.8681	0
(PdCl4)ClCs3	0.8682	0
(PdCl4)Br0.5F0.5K3	0.8697	0
(PtBr4)Cl0.5I0.5Cs3	0.8741	0
(PtBr4)Cl0.5I0.5Rb3	0.8784	0
(PdCl4)ClK3	0.8802	0
(PtBr4)F0.5I0.5Rb3	0.8816	1
(PtBr4)BrCs3	0.8825	0
(NiBr4)F0.5I0.5Rb3	0.8863	0
(NiBr4)BrRb3	0.8951	0
(NiBr4)F0.5I0.5K3	0.8986	0
(NiBr4)Br0.5Cl0.5Rb3	0.918	0
(NiBr4)Br0.5Cl0.5K3	0.9209	0
(PtBr4)BrRb3	0.928	0
(PtBr4)Br0.5Cl0.5Cs3	0.9341	0
(NiBr4)ClRb3	0.9405	0
(FeF4)FNa3	0.969	1
(NiBr4)ClK3	0.9709	0
(PtBr4)Br0.5Cl0.5Rb3	0.9732	0
(PtBr4)Br0.5Cl0.5K3	0.9775	1
(PtBr4)ClCs3	1.0011	0
(PtBr4)ClK3	1.0098	1
(PtBr4)ClRb3	1.0309	0
(PtCl4)F0.5I0.5K3	1.0396	1
(NiCl4)F0.5I0.5Rb3	1.0439	0
(NiCl4)ClK3	1.0589	0
(NiCl4)F0.5I0.5K3	1.0608	0
(NiCl4)ClRb3	1.0673	0
(PtCl4)F0.5I0.5Rb3	1.071	1
(PtCl4)Br0.5Cl0.5Rb3	1.1184	0
(PtCl4)ClCs3	1.1213	0
(NiCl4)Br0.5F0.5K3	1.1219	0
(PtCl4)ClRb3	1.147	0
(PtCl4)Br0.5Cl0.5K3	1.1488	1
(PtCl4)ClK3	1.1583	1
(PtCl4)Br0.5F0.5K3	1.1598	1
(PdF4)FNa3	1.4785	0
(NiF4)FNa3	1.6273	0
(PtF4)FNa3	1.7398	1
(MnF4)FNa3	2.636	0
(MnI4)Cl0.5I0.5Cs3	2.981	1
(MnI4)Cl0.5I0.5Rb3	3.005	0
(MnI4)Br0.5I0.5Cs3	3.07	1
(MnI4)ICs3	3.081	1
(MnI4)BrRb3	3.089	1
(MnI4)Br0.5Cl0.5Cs3	3.136	1
(MnI4)BrCs3	3.136	1
(MnBr4)BrCs3	3.434	1
(MnBr4)F0.5I0.5K3	3.455	0
(MnBr4)Cl0.5I0.5Rb3	3.479	1	aimd	ph
(MnBr4)Br0.5Cl0.5K3	3.508	0
(MnBr4)ClK3	3.521	0
(MnBr4)F0.5I0.5Rb3	3.523	0
(MnBr4)Cl0.5I0.5Cs3	3.569	0
(MnCl4)ClCs3	3.588	0
(MnBr4)Br0.5Cl0.5Rb3	3.626	1
(ZnI4)Cl0.5I0.5Rb3	3.6306	1	aimd	ph
(MnBr4)ClRb3	3.642	1	aimd	ph
(MnBr4)BrRb3	3.66	0
(MnBr4)Br0.5Cl0.5Cs3	3.697	0
(ZnBr4)F0.5I0.5Rb3	3.7211	1
(MnBr4)ClCs3	3.722	0
(ZnI4)ICs3	3.7486	1
(MnCl4)ClK3	3.752	0
(ZnI4)Cl0.5I0.5Cs3	3.7553	1
(MnCl4)Br0.5Cl0.5K3	3.768	0
(ZnI4)Br0.5Cl0.5K3	3.7716	1
(MnCl4)Br0.5F0.5K3	3.777	0
(ZnI4)Br0.5I0.5Cs3	3.7831	1
(ZnI4)BrRb3	3.7933	1
(MnCl4)F0.5I0.5K3	3.794	0
(MnCl4)F0.5I0.5Rb3	3.816	0
(ZnI4)Br0.5Cl0.5Rb3	3.8376	1
(ZnBr4)Cl0.5I0.5Rb3	3.8584	0
(MnCl4)Br0.5Cl0.5Rb3	3.862	0
(MnCl4)ClRb3	3.862	0
(ZnBr4)F0.5I0.5K3	3.9097	0
(MnCl4)Br0.5Cl0.5Cs3	3.933	0
(ZnBr4)Cl0.5I0.5Cs3	4.0211	1
(ZnI4)BrCs3	4.0329	0
(MgBr4)F0.5I0.5Rb3	4.06	1
(ZnI4)Br0.5Cl0.5Cs3	4.0609	1
(ZnBr4)Br0.5Cl0.5K3	4.1081	1
(MgBr4)F0.5I0.5K3	4.11	0
(ZnBr4)BrRb3	4.1553	1
(ZnBr4)Br0.5Cl0.5Rb3	4.1703	1
(ZnCl4)F0.5I0.5Rb3	4.2392	1
(ZnBr4)ClK3	4.3037	1
(MgBr4)BrRb3	4.326	1
(MgBr4)Br0.5Cl0.5K3	4.327	1
(ZnBr4)BrCs3	4.3397	1
(ZnCl4)F0.5I0.5K3	4.3518	0
(MgBr4)Br0.5Cl0.5Rb3	4.355	1
(ZnBr4)ClRb3	4.3615	1
(ZnBr4)Br0.5Cl0.5Cs3	4.3871	0
(ZnF4)FNa3	4.4547	1
(MgCl4)F0.5I0.5Rb3	4.463	1
(MgBr4)ClK3	4.49	1
(MgBr4)BrCs3	4.531	0
(MgCl4)F0.5I0.5K3	4.543	0
(MgBr4)ClRb3	4.554	1
(ZnBr4)ClCs3	4.5627	1
(MgBr4)Br0.5Cl0.5Cs3	4.579	0
(ZnCl4)Br0.5Cl0.5K3	4.7064	1
(ZnCl4)Br0.5F0.5K3	4.7117	1
(ZnCl4)Br0.5Cl0.5Rb3	4.7119	0
(MgBr4)ClCs3	4.78	0
(ZnCl4)ClK3	4.898	1
(MgCl4)Br0.5F0.5K3	4.901	0
(ZnCl4)ClRb3	4.955	1
(ZnCl4)ClCs3	5.0541	1
(MgCl4)ClK3	5.056	1
(MgCl4)ClRb3	5.102	1
(MgCl4)ClCs3	5.217	1
(MgF4)FNa3	5.334	1
kind3
(AuO4)F0.5Cl0.5Sr3	0
(AuO4)F0.5Cl0.5Ba3	0
(AuS4)F0.5I0.5Ba3	0
(SbS4)F0.5I0.5Ba3	1.5696	0
(InSe4)F0.5I0.5Ba3	2.7714	1
(InS4)F0.5I0.5Ba3	3.2622	1
(InS4)F0.5Br0.5Ba3	3.377	1
(InO4)F0.5Cl0.5Ba3	3.3869	0
(InO4)F0.5Cl0.5Sr3	3.4027	0
(InO4)FSr3	3.6601	1
(GaO4)FSr3	4.5965	0
(GaO4)FCa3	4.9343	0
(AlO4)FSr3	5.0561	0
(AlO4)FCa3	5.5448	0
kind4
(CrSe4)O0.5Se0.5Ba3	0.215	0
(CrS4)O0.5Se0.5Ba3	0.396	0
(CrS4)O0.5S0.5Ba3	0.45	0
(CrO4)OSr3	1.3107	1
(CrO4)OCa3	1.3334	1
(SnO4)OSr3	1.5057	1
(SnO4)OCa3	1.5692	1
(SnSe4)O0.5Se0.5Ba3	1.639	0
(ZrS4)O0.5Se0.5Ba3	1.9444	1
(HfS4)O0.5Se0.5Ba3	1.9983	1
(ZrS4)O0.5S0.5Ba3	2.03	1
(HfS4)O0.5S0.5Ba3	2.064	1
(SnS4)O0.5Se0.5Ba3	2.1706	0
(SnS4)O0.5S0.5Ba3	2.2817	0
(HfO4)OCa3	3.0501	1
(HfO4)OSr3	3.0698	1
(ZrO4)OCa3	3.0826	1
(ZrO4)OSr3	3.163	1
(TiO4)OCa3	3.3271	1
(GeO4)OCa3	3.3341	0
(TiO4)OSr3	3.3816	0
all number = 266

## Sheet: main and transition
formula [MN]BX3	bandgap	direct(1)/ indirect(0)
main group elements
(LiCl4)N0.5As0.5Ba3	0.9769	1
(LiCl4)N0.5P0.5Ba3	1.0267	1
(LiF4)NSr3	1.0605	1
(SnO4)OSr3	1.5057	1
(SnO4)OCa3	1.5692	1
(SbS4)F0.5I0.5Ba3	1.5696	0
(LiF4)NCa3	1.5885	1
(SnSe4)O0.5Se0.5Ba3	1.639	0
(SnS4)O0.5Se0.5Ba3	2.1706	0
(SnS4)O0.5S0.5Ba3	2.2817	0
(InSe4)F0.5I0.5Ba3	2.7714	1
(InS4)F0.5I0.5Ba3	3.2622	1
(GeO4)OCa3	3.3341	0
(InS4)F0.5Br0.5Ba3	3.377	1
(InO4)F0.5Cl0.5Ba3	3.3869	0
(InO4)F0.5Cl0.5Sr3	3.4027	0
(InO4)FSr3	3.6601	1
(GaO4)FSr3	4.5965	0
(GaO4)FCa3	4.9343	0
(AlO4)FSr3	5.0561	0
(AlO4)FCa3	5.5448	0
number = 21
transition metal elements
(CoBr4)Br0.5Cl0.5Cs3	0
(CoBr4)Br0.5Cl0.5K3	0
(CoBr4)Br0.5Cl0.5Rb3	0
(CoBr4)BrCs3	0
(CoBr4)BrRb3	0
(CoBr4)Cl0.5I0.5Rb3	0
(CoBr4)ClCs3	0
(CoBr4)ClK3	0
(CoBr4)ClRb3	0
(CoBr4)F0.5I0.5K3	0
(CoBr4)F0.5I0.5Rb3	0
(CoCl4)Br0.5Cl0.5K3	0
(CoCl4)Br0.5F0.5K3	0
(CoCl4)ClCs3	0
(CoCl4)ClK3	0
(CoCl4)ClRb3	0
(CoCl4)F0.5I0.5K3	0
(CoCl4)F0.5I0.5Rb3	0
(CoF4)FNa3	0
(CoI4)Br0.5Cl0.5Cs3	0
(CoI4)Br0.5Cl0.5K3	0
(CoI4)Br0.5Cl0.5Rb3	0
(CoI4)Br0.5I0.5Cs3	0
(CoI4)BrCs3	0
(CoI4)BrRb3	0
(CoI4)Cl0.5I0.5Cs3	0
(CoI4)Cl0.5I0.5Rb3	0
(CoI4)ICs3	0
(CuBr4)Br0.5Cl0.5Cs3	0
(CuBr4)Br0.5Cl0.5K3	0
(CuBr4)Br0.5Cl0.5Rb3	0
(CuBr4)BrCs3	0
(CuBr4)BrRb3	0
(CuBr4)ClCs3	0
(CuBr4)ClK3	0
(CuBr4)ClRb3	0
(CuBr4)F0.5I0.5K3	0
(CuBr4)F0.5I0.5Rb3	0
(CuCl4)Br0.5F0.5K3	0
(CuCl4)ClCs3	0
(CuCl4)ClK3	0
(CuCl4)ClRb3	0
(CuCl4)F0.5I0.5K3	0
(CuCl4)F0.5I0.5Rb3	0
(CuF4)FNa3	0
(FeBr4)Br0.5Cl0.5Cs3	0
(FeBr4)Br0.5Cl0.5K3	0
(FeBr4)Br0.5Cl0.5Rb3	0
(FeBr4)BrCs3	0
(FeBr4)BrRb3	0
(FeBr4)Cl0.5I0.5Cs3	0
(FeBr4)Cl0.5I0.5Rb3	0
(FeBr4)ClCs3	0
(FeBr4)ClK3	0
(FeBr4)ClRb3	0
(FeBr4)F0.5I0.5K3	0
(FeBr4)F0.5I0.5Rb3	0
(FeCl4)Br0.5Cl0.5Cs3	0
(FeCl4)Br0.5Cl0.5K3	0
(FeCl4)Br0.5Cl0.5Rb3	0
(FeCl4)Br0.5F0.5K3	0
(FeCl4)ClCs3	0
(FeCl4)ClK3	0
(FeCl4)ClRb3	0
(AuO4)F0.5Cl0.5Sr3	0
(AuO4)F0.5Cl0.5Ba3	0
(AuS4)F0.5I0.5Ba3	0
(CrSe4)O0.5Se0.5Ba3	0.215	0
(PdI4)Cl0.5I0.5Rb3	0.2916	0
(PdI4)ICs3	0.3743	0
(PdI4)Br0.5I0.5Cs3	0.3856	0
(CrS4)O0.5Se0.5Ba3	0.396	0
(PdI4)Cl0.5I0.5Cs3	0.4059	0
(PdBr4)F0.5I0.5K3	0.4252	0
(CrS4)O0.5S0.5Ba3	0.45	0
(FeI4)BrCs3	0.4925	1
(PdI4)BrCs3	0.5226	0
(PdBr4)F0.5I0.5Rb3	0.5231	0
(FeI4)BrRb3	0.5247	1
(FeI4)Cl0.5I0.5Rb3	0.5385	1
(PdBr4)Cl0.5I0.5Rb3	0.5418	0
(FeI4)Br0.5Cl0.5Rb3	0.5523	1
(PdI4)BrRb3	0.5543	0
(FeI4)Br0.5I0.5Cs3	0.5586	1
(PdI4)Br0.5Cl0.5Cs3	0.5754	0
(FeI4)Cl0.5I0.5Cs3	0.5767	1
(FeI4)ICs3	0.5776	1
(FeI4)Br0.5Cl0.5Cs3	0.5829	1
(PdBr4)Cl0.5I0.5Cs3	0.5855	0
(PtI4)Cl0.5I0.5Rb3	0.5912	1
(FeCl4)F0.5I0.5K3	0.5955	1
(PdCl4)F0.5I0.5K3	0.5991	0
(PtI4)ICs3	0.6117	0
(FeCl4)F0.5I0.5Rb3	0.6146	1
(PtI4)Br0.5I0.5Cs3	0.6234	0
(PtI4)Br0.5Cl0.5K3	0.6268	0
(PdBr4)BrCs3	0.6319	0
(PdCl4)F0.5I0.5Rb3	0.654	0
(PdBr4)BrRb3	0.6608	0
(PtI4)Cl0.5I0.5Cs3	0.6678	0
(PdBr4)Br0.5Cl0.5Cs3	0.6739	0
(PdBr4)Br0.5Cl0.5K3	0.6793	0
(PdBr4)Br0.5Cl0.5Rb3	0.6937	0
(PdBr4)ClCs3	0.7194	0
(PtI4)BrCs3	0.7437	0
(NiBr4)ClCs3	0.7498	0
(PtI4)Br0.5Cl0.5Rb3	0.7553	0
(PtI4)BrRb3	0.7565	0
(PdBr4)ClRb3	0.7819	0
(PdBr4)ClK3	0.7906	0
(PtI4)Br0.5Cl0.5Cs3	0.8019	0
(NiCl4)ClCs3	0.8057	0
(NiBr4)Br0.5Cl0.5Cs3	0.822	0
(PdCl4)Br0.5Cl0.5Rb3	0.8286	0
(PdCl4)Br0.5Cl0.5Cs3	0.8298	0
(PdCl4)Br0.5Cl0.5K3	0.8347	0
(NiBr4)BrCs3	0.8356	0
(PtBr4)F0.5I0.5K3	0.8539	1
(PdCl4)ClRb3	0.8681	0
(PdCl4)ClCs3	0.8682	0
(PdCl4)Br0.5F0.5K3	0.8697	0
(PtBr4)Cl0.5I0.5Cs3	0.8741	0
(PtBr4)Cl0.5I0.5Rb3	0.8784	0
(PdCl4)ClK3	0.8802	0
(PtBr4)F0.5I0.5Rb3	0.8816	1
(PtBr4)BrCs3	0.8825	0
(NiBr4)F0.5I0.5Rb3	0.8863	0
(NiBr4)BrRb3	0.8951	0
(NiBr4)F0.5I0.5K3	0.8986	0
(NiBr4)Br0.5Cl0.5Rb3	0.918	0
(NiBr4)Br0.5Cl0.5K3	0.9209	0
(PtBr4)BrRb3	0.928	0
(PtBr4)Br0.5Cl0.5Cs3	0.9341	0
(NiBr4)ClRb3	0.9405	0
(FeF4)FNa3	0.969	1
(NiBr4)ClK3	0.9709	0
(PtBr4)Br0.5Cl0.5Rb3	0.9732	0
(PtBr4)Br0.5Cl0.5K3	0.9775	1
(PtBr4)ClCs3	1.0011	0
(PtBr4)ClK3	1.0098	1
(PtBr4)ClRb3	1.0309	0
(PtCl4)F0.5I0.5K3	1.0396	1
(NiCl4)F0.5I0.5Rb3	1.0439	0
(NiCl4)ClK3	1.0589	0
(NiCl4)F0.5I0.5K3	1.0608	0
(NiCl4)ClRb3	1.0673	0
(PtCl4)F0.5I0.5Rb3	1.071	1
(PtCl4)Br0.5Cl0.5Rb3	1.1184	0
(PtCl4)ClCs3	1.1213	0
(NiCl4)Br0.5F0.5K3	1.1219	0
(PtCl4)ClRb3	1.147	0
(PtCl4)Br0.5Cl0.5K3	1.1488	1
(PtCl4)ClK3	1.1583	1
(PtCl4)Br0.5F0.5K3	1.1598	1
(CrO4)OSr3	1.3107	1
(CrO4)OCa3	1.3334	1
(PdF4)FNa3	1.4785	0
(NiF4)FNa3	1.6273	0
(PtF4)FNa3	1.7398	1
(ZrS4)O0.5Se0.5Ba3	1.9444	1
(HfS4)O0.5Se0.5Ba3	1.9983	1
(ZrS4)O0.5S0.5Ba3	2.03	1
(HfS4)O0.5S0.5Ba3	2.064	1
(MnF4)FNa3	2.636	0
(MnI4)Cl0.5I0.5Cs3	2.981	1
(MnI4)Cl0.5I0.5Rb3	3.005	0
(HfO4)OCa3	3.0501	1
(HfO4)OSr3	3.0698	1
(MnI4)Br0.5I0.5Cs3	3.07	1
(MnI4)ICs3	3.081	1
(ZrO4)OCa3	3.0826	1
(MnI4)BrRb3	3.089	1
(MnI4)Br0.5Cl0.5Cs3	3.136	1
(MnI4)BrCs3	3.136	1
(ZrO4)OSr3	3.163	1
(TiO4)OCa3	3.3271	1
(TiO4)OSr3	3.3816	0
(MnBr4)BrCs3	3.434	1
(MnBr4)F0.5I0.5K3	3.455	0
(MnBr4)Cl0.5I0.5Rb3	3.479	1
(MnBr4)Br0.5Cl0.5K3	3.508	0
(MnBr4)ClK3	3.521	0
(MnBr4)F0.5I0.5Rb3	3.523	0
(MnBr4)Cl0.5I0.5Cs3	3.569	0
(MnCl4)ClCs3	3.588	0
(MnBr4)Br0.5Cl0.5Rb3	3.626	1
(ZnI4)Cl0.5I0.5Rb3	3.6306	1
(MnBr4)ClRb3	3.642	1
(MnBr4)BrRb3	3.66	0
(MnBr4)Br0.5Cl0.5Cs3	3.697	0
(ZnBr4)F0.5I0.5Rb3	3.7211	1
(MnBr4)ClCs3	3.722	0
(ZnI4)ICs3	3.7486	1
(MnCl4)ClK3	3.752	0
(ZnI4)Cl0.5I0.5Cs3	3.7553	1
(MnCl4)Br0.5Cl0.5K3	3.768	0
(ZnI4)Br0.5Cl0.5K3	3.7716	1
(MnCl4)Br0.5F0.5K3	3.777	0
(ZnI4)Br0.5I0.5Cs3	3.7831	1
(ZnI4)BrRb3	3.7933	1
(MnCl4)F0.5I0.5K3	3.794	0
(MnCl4)F0.5I0.5Rb3	3.816	0
(ZnI4)Br0.5Cl0.5Rb3	3.8376	1
(ZnBr4)Cl0.5I0.5Rb3	3.8584	0
(MnCl4)Br0.5Cl0.5Rb3	3.862	0
(MnCl4)ClRb3	3.862	0
(ZnBr4)F0.5I0.5K3	3.9097	0
(MnCl4)Br0.5Cl0.5Cs3	3.933	0
(ZnBr4)Cl0.5I0.5Cs3	4.0211	1
(ZnI4)BrCs3	4.0329	0
(MgBr4)F0.5I0.5Rb3	4.06	1
(ZnI4)Br0.5Cl0.5Cs3	4.0609	1
(ZnBr4)Br0.5Cl0.5K3	4.1081	1
(MgBr4)F0.5I0.5K3	4.11	0
(ZnBr4)BrRb3	4.1553	1
(ZnBr4)Br0.5Cl0.5Rb3	4.1703	1
(ZnCl4)F0.5I0.5Rb3	4.2392	1
(ZnBr4)ClK3	4.3037	1
(MgBr4)BrRb3	4.326	1
(MgBr4)Br0.5Cl0.5K3	4.327	1
(ZnBr4)BrCs3	4.3397	1
(ZnCl4)F0.5I0.5K3	4.3518	0
(MgBr4)Br0.5Cl0.5Rb3	4.355	1
(ZnBr4)ClRb3	4.3615	1
(ZnBr4)Br0.5Cl0.5Cs3	4.3871	0
(ZnF4)FNa3	4.4547	1
(MgCl4)F0.5I0.5Rb3	4.463	1
(MgBr4)ClK3	4.49	1
(MgBr4)BrCs3	4.531	0
(MgCl4)F0.5I0.5K3	4.543	0
(MgBr4)ClRb3	4.554	1
(ZnBr4)ClCs3	4.5627	1
(MgBr4)Br0.5Cl0.5Cs3	4.579	0
(ZnCl4)Br0.5Cl0.5K3	4.7064	1
(ZnCl4)Br0.5F0.5K3	4.7117	1
(ZnCl4)Br0.5Cl0.5Rb3	4.7119	0
(MgBr4)ClCs3	4.78	0
(ZnCl4)ClK3	4.898	1
(MgCl4)Br0.5F0.5K3	4.901	0
(ZnCl4)ClRb3	4.955	1
(ZnCl4)ClCs3	5.0541	1
(MgCl4)ClK3	5.056	1
(MgCl4)ClRb3	5.102	1
(MgCl4)ClCs3	5.217	1
(MgF4)FNa3	5.334	1
number = 245
all number = 266

## Sheet: candidates
formula [MN]BX3	bandgap	direct(1)/ indirect(0)
main group elements
(SnO4)OSr3	1.5057	1
(SnO4)OCa3	1.5692	1
(SbS4)F0.5I0.5Ba3	1.5696	0
(LiF4)NCa3	1.5885	1
(SnSe4)O0.5Se0.5Ba3	1.639	0
(SnS4)O0.5Se0.5Ba3	2.1706	0
(SnS4)O0.5S0.5Ba3	2.2817	0
(InSe4)F0.5I0.5Ba3	2.7714	1
(InS4)F0.5I0.5Ba3	3.2622	1
number = 9
transition metal elements
(ZrS4)O0.5S0.5Ba3	2.03	1
(HfS4)O0.5S0.5Ba3	2.064	1
(MnF4)FNa3	2.636	0
(MnI4)Cl0.5I0.5Cs3	2.981	1
(MnI4)Cl0.5I0.5Rb3	3.005	0
(HfO4)OCa3	3.0501	1
(HfO4)OSr3	3.0698	1
(MnI4)Br0.5I0.5Cs3	3.07	1
(MnI4)ICs3	3.081	1
(ZrO4)OCa3	3.0826	1
(MnI4)BrRb3	3.089	1
(MnI4)Br0.5Cl0.5Cs3	3.136	1
(MnI4)BrCs3	3.136	1
(ZrO4)OSr3	3.163	1
(TiO4)OCa3	3.3271	1
(TiO4)OSr3	3.3816	0
(MnBr4)BrCs3	3.434	1
(MnBr4)F0.5I0.5K3	3.455	0
(MnBr4)Cl0.5I0.5Rb3	3.479	1
(MnBr4)Br0.5Cl0.5K3	3.508	0
(MnBr4)ClK3	3.521	0
(MnBr4)F0.5I0.5Rb3	3.523	0
(MnBr4)Cl0.5I0.5Cs3	3.569	0
(MnCl4)ClCs3	3.588	0
(MnBr4)Br0.5Cl0.5Rb3	3.626	1
(ZnI4)Cl0.5I0.5Rb3	3.6306	1
(MnBr4)ClRb3	3.642	1
(MnBr4)BrRb3	3.66	0
(MnBr4)Br0.5Cl0.5Cs3	3.697	0
(ZnBr4)F0.5I0.5Rb3	3.7211	1
(MnBr4)ClCs3	3.722	0
(ZnI4)ICs3	3.7486	1
(MnCl4)ClK3	3.752	0
(ZnI4)Cl0.5I0.5Cs3	3.7553	1
(MnCl4)Br0.5Cl0.5K3	3.768	0
(ZnI4)Br0.5Cl0.5K3	3.7716	1
(MnCl4)Br0.5F0.5K3	3.777	0
(ZnI4)Br0.5I0.5Cs3	3.7831	1
(ZnI4)BrRb3	3.7933	1
(MnCl4)F0.5I0.5K3	3.794	0
number = 40
all number = 49
